# Supplementary material for: Competition and niche construction in a model of cancer metastasis
Source: PubMed Central journal article supplement (PMC5973602; doi:10.1371/journal.pone.0198163), 2018-05-29
Supplement: pone.0198163.s008.pdf [file pone.0198163.s008.pdf]

S3 Table: Governing equations of the model for  
competition structure III

---

|                     |                                                                                                                                  |
|---------------------|----------------------------------------------------------------------------------------------------------------------------------|
| Primary cheaters    | $\frac{dn_{00}}{dt} = r_{00}n_{00} \left( 1 - \frac{n_{00} + n_{01} + \theta(n_{10} + n_{11})}{k + \beta_0 R} \right) - mn_{00}$ |
| Secondary producers | $\frac{dn_{01}}{dt} = r_{01}n_{01} \left( 1 - \frac{n_{00} + n_{01} + \theta(n_{10} + n_{11})}{k + \beta_0 R} \right) - mn_{01}$ |
| Primary producers   | $\frac{dn_{10}}{dt} = r_{10}n_{10} \left( 1 - \frac{\phi(n_{00} + n_{01}) + n_{10} + n_{11}}{k + \beta_1 R} \right) - mn_{10}$   |
| Global producers    | $\frac{dn_{11}}{dt} = r_{11}n_{11} \left( 1 - \frac{\phi(n_{00} + n_{01}) + n_{10} + n_{11}}{k + \beta_1 R} \right) - mn_{11}$   |
| Resource            | $\frac{dR}{dt} = g(n_{10} + n_{11}) - lR$                                                                                        |

---
